# Supplementary figures and images for: High dose concentration administration of ascorbic acid inhibits tumor growth in BALB/C mice implanted with sarcoma 180 cancer cells via the restriction of angiogenesis
Source: Springer Nature journal article supplement (doi:10.1186/1479-5876-7-70), 2009-08-11

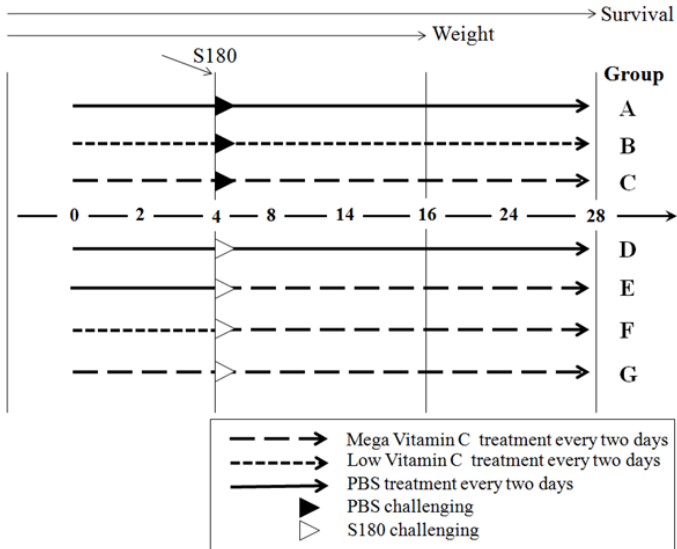

Supplement: 12967_2009_381_MOESM1_ESM.pdf [file 12967_2009_381_MOESM1_ESM.pdf]

Day

0 — 4 — 12 — 16 —→

Group

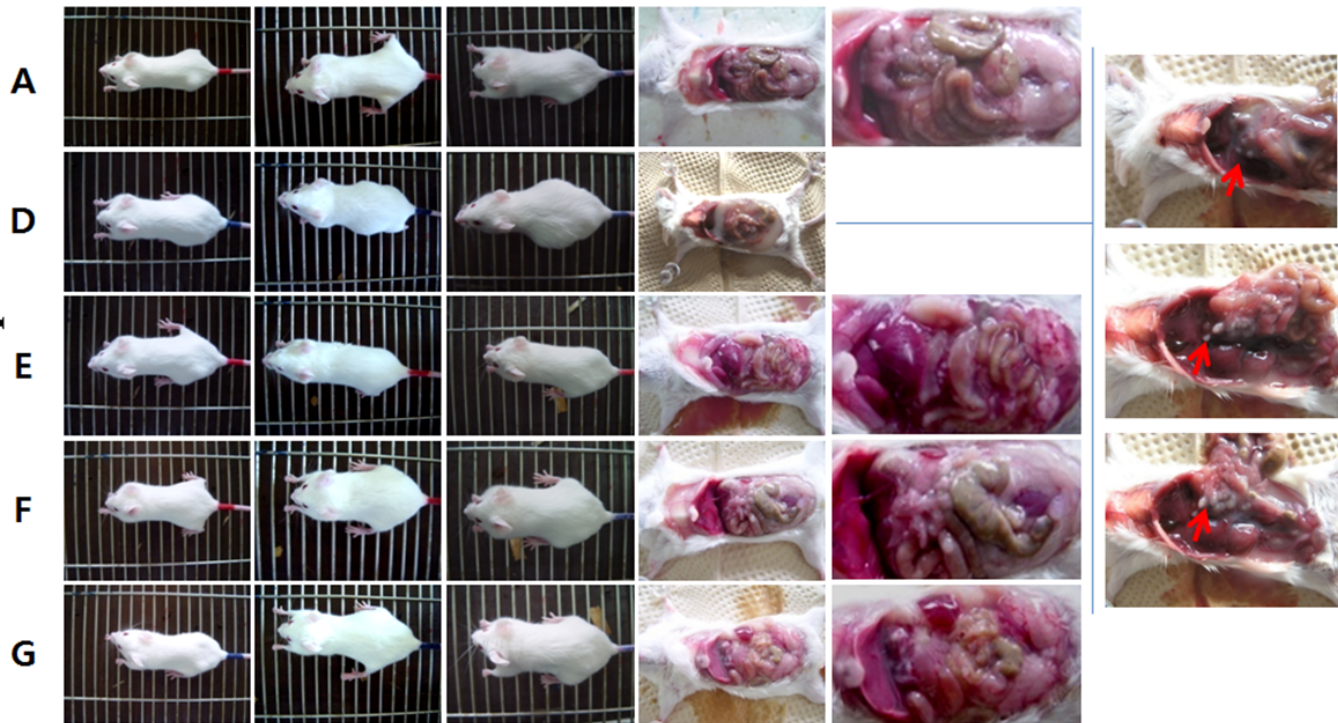

Supplement: 12967_2009_381_MOESM2_ESM.pdf [file 12967_2009_381_MOESM2_ESM.pdf]

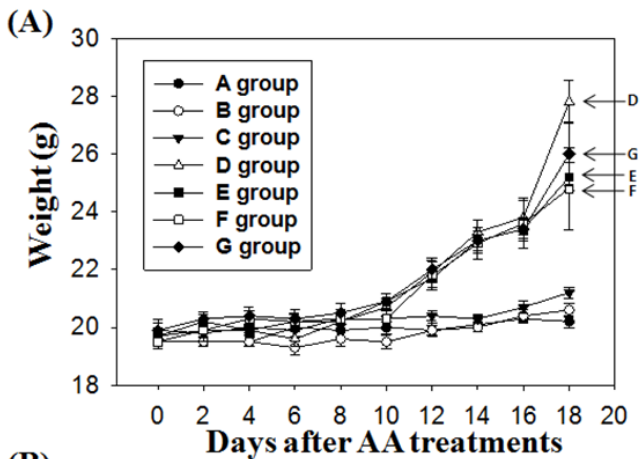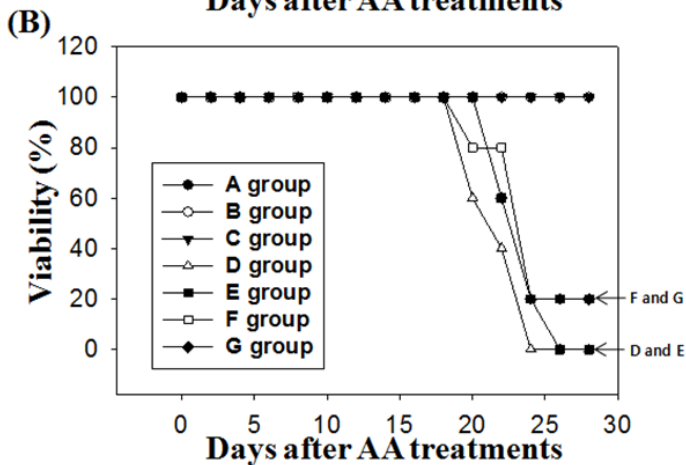

Supplement: 12967_2009_381_MOESM3_ESM.pdf [file 12967_2009_381_MOESM3_ESM.pdf]

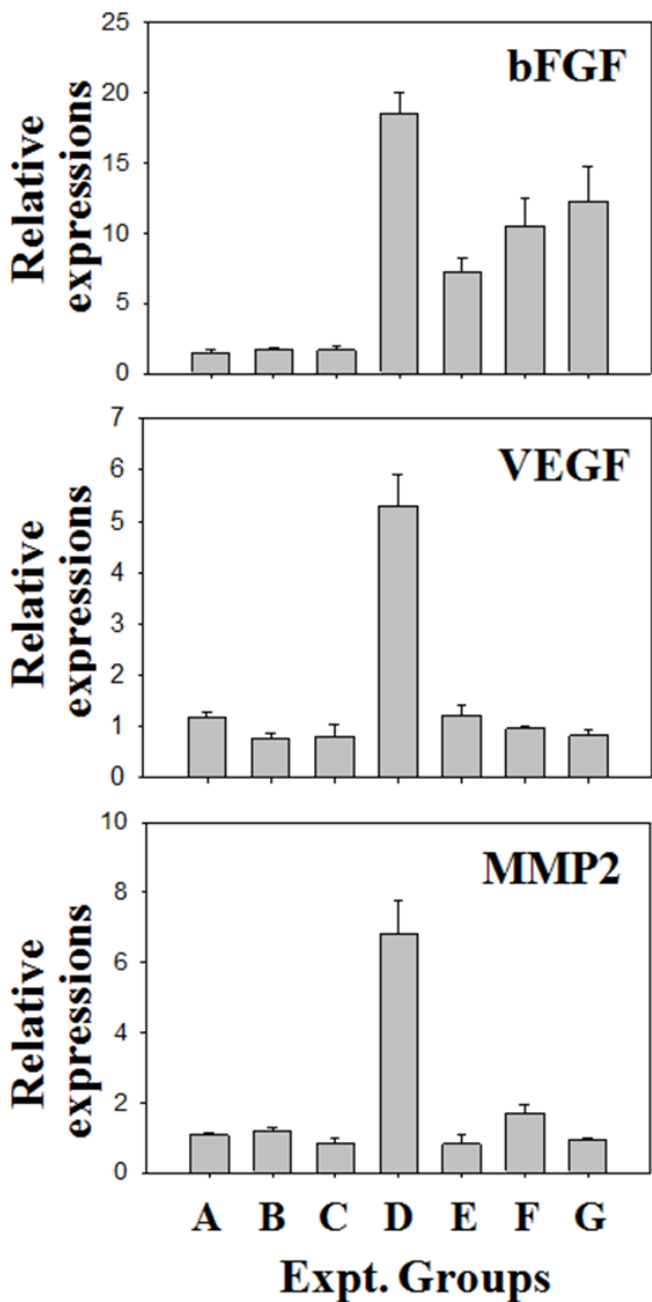

Supplement: 12967_2009_381_MOESM5_ESM.pdf [file 12967_2009_381_MOESM5_ESM.pdf]

**NIH3T3**

**ras-NIH 3T3**

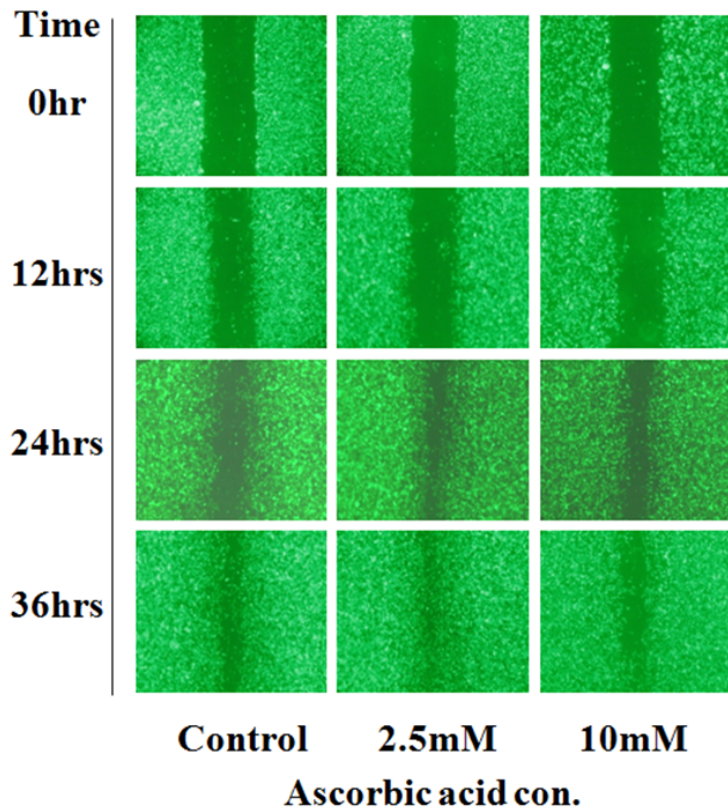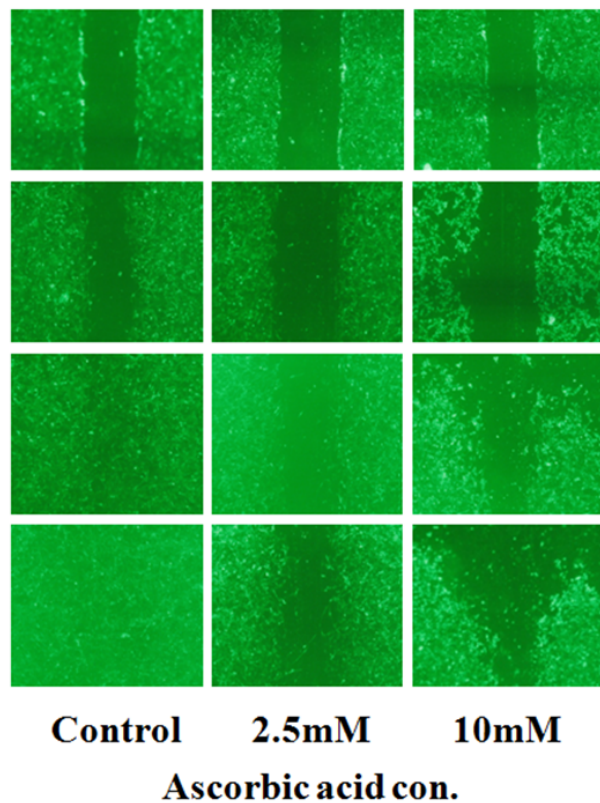

Supplement: 12967_2009_381_MOESM6_ESM.pdf [file 12967_2009_381_MOESM6_ESM.pdf]
